# Supplementary material for: Effects of Ambient O3 on Respiratory Mortality, Especially the Combined Effects of PM2.5 and O3
Source: MDPI journal article supplement (doi:10.3390/toxics11110892), 2023-10-30
Supplement: s1 [file s1]

## Supplementary materials

**Table S1.** Distribution of respiratory deaths.

|                        | Mean | Min | P25  | P50  | P75  | Max  |
|------------------------|------|-----|------|------|------|------|
| Respiratory death toll |      |     |      |      |      |      |
| All                    | 19.4 | 3.0 | 15.0 | 19.0 | 23.0 | 73.0 |
| Males                  | 11.3 | 1.0 | 8.0  | 11.0 | 14.0 | 35.0 |
| Females                | 8.1  | 0.0 | 6.0  | 8.0  | 10.0 | 38.0 |
| ≥55 years              | 18.0 | 3.0 | 14.0 | 18.0 | 21.0 | 68.0 |
| <55 years              | 1.4  | 0.0 | 0.0  | 1.0  | 2.0  | 8.0  |
| Han nationality        | 18.3 | 2.0 | 14.0 | 18.0 | 22.0 | 70.0 |
| Minority nationality   | 1.0  | 0.0 | 0.0  | 1.0  | 2.0  | 7.0  |
| Married                | 11.5 | 0.0 | 8.0  | 11.0 | 14.0 | 34.0 |
| Other marital status   | 7.8  | 0.0 | 5.0  | 7.0  | 10.0 | 39.0 |
| Inside work            | 13.4 | 0.0 | 10.0 | 13.0 | 17.0 | 50.0 |
| Outside work           | 3.6  | 0.0 | 2.0  | 3.0  | 5.0  | 12.0 |
| High education         | 4.5  | 0.0 | 3.0  | 4.0  | 6.0  | 15.0 |
| Low education          | 14.9 | 2.0 | 11.0 | 14.0 | 18.0 | 61.0 |

**Table S2.** Distribution of annual air pollutants between 2014 to 2018.

| Pollutants                             | Year | Mean   | Min   | P25   | P50    | P75    | Max    |
|----------------------------------------|------|--------|-------|-------|--------|--------|--------|
| O <sub>3</sub> (µg/m <sup>3</sup> )    | 2014 | 95.72  | 12.00 | 57.00 | 91.00  | 129.00 | 250.00 |
|                                        | 2015 | 56.20  | 9.00  | 31.00 | 49.00  | 77.00  | 178.00 |
|                                        | 2016 | 58.34  | 11.00 | 33.00 | 55.50  | 78.00  | 162.00 |
|                                        | 2017 | 63.23  | 10.00 | 35.00 | 58.00  | 81.00  | 218.00 |
|                                        | 2018 | 60.15  | 9.00  | 31.00 | 53.00  | 82.00  | 195.00 |
| PM <sub>2.5</sub> (µg/m <sup>3</sup> ) | 2014 | 71.12  | 12.00 | 40.00 | 59.00  | 91.00  | 277.00 |
|                                        | 2015 | 66.76  | 10.00 | 31.00 | 51.00  | 86.00  | 291.00 |
|                                        | 2016 | 52.17  | 4.00  | 30.00 | 43.00  | 64.75  | 221.00 |
|                                        | 2017 | 48.43  | 7.00  | 25.00 | 36.00  | 60.00  | 224.00 |
|                                        | 2018 | 42.21  | 6.00  | 21.00 | 34.00  | 55.00  | 186.00 |
| PM <sub>10</sub> (µg/m <sup>3</sup> )  | 2014 | 118.78 | 30.00 | 76.00 | 106.00 | 152.00 | 369.00 |
|                                        | 2015 | 106.54 | 19.00 | 58.00 | 91.00  | 137.00 | 396.00 |
|                                        | 2016 | 90.57  | 8.00  | 58.25 | 79.00  | 109.00 | 355.00 |
|                                        | 2017 | 84.53  | 17.00 | 50.00 | 72.00  | 104.00 | 348.00 |
|                                        | 2018 | 72.33  | 18.00 | 45.00 | 67.00  | 91.00  | 195.00 |
| SO <sub>2</sub> (µg/m <sup>3</sup> )   | 2014 | 77.92  | 4.00  | 24.00 | 44.00  | 115.00 | 332.00 |
|                                        | 2015 | 59.60  | 3.00  | 14.00 | 29.00  | 87.00  | 316.00 |
|                                        | 2016 | 42.75  | 4.00  | 14.25 | 27.00  | 68.50  | 173.00 |
|                                        | 2017 | 33.58  | 4.00  | 14.00 | 23.00  | 43.00  | 160.00 |
|                                        | 2018 | 23.43  | 6.00  | 14.00 | 21.00  | 29.00  | 98.00  |
| NO <sub>2</sub> (µg/m <sup>3</sup> )   | 2014 | 51.48  | 18.00 | 37.00 | 48.00  | 62.00  | 116.00 |
|                                        | 2015 | 44.86  | 18.00 | 31.00 | 40.00  | 55.00  | 125.00 |
|                                        | 2016 | 38.12  | 13.00 | 27.00 | 36.00  | 46.75  | 89.00  |
|                                        | 2017 | 39.01  | 14.00 | 28.00 | 35.00  | 49.00  | 109.00 |
|                                        | 2018 | 35.70  | 12.00 | 25.00 | 33.00  | 45.00  | 78.00  |
| CO (mg/m <sup>3</sup> )                | 2014 | 1.09   | 0.30  | 0.80  | 1.00   | 1.40   | 3.30   |
|                                        | 2015 | 1.02   | 0.32  | 0.64  | 0.86   | 1.22   | 3.12   |
|                                        | 2016 | 0.92   | 0.31  | 0.66  | 0.86   | 1.10   | 2.59   |
|                                        | 2017 | 0.95   | 0.31  | 0.62  | 0.83   | 1.16   | 2.69   |
|                                        | 2018 | 0.97   | 0.38  | 0.69  | 0.87   | 1.18   | 2.35   |

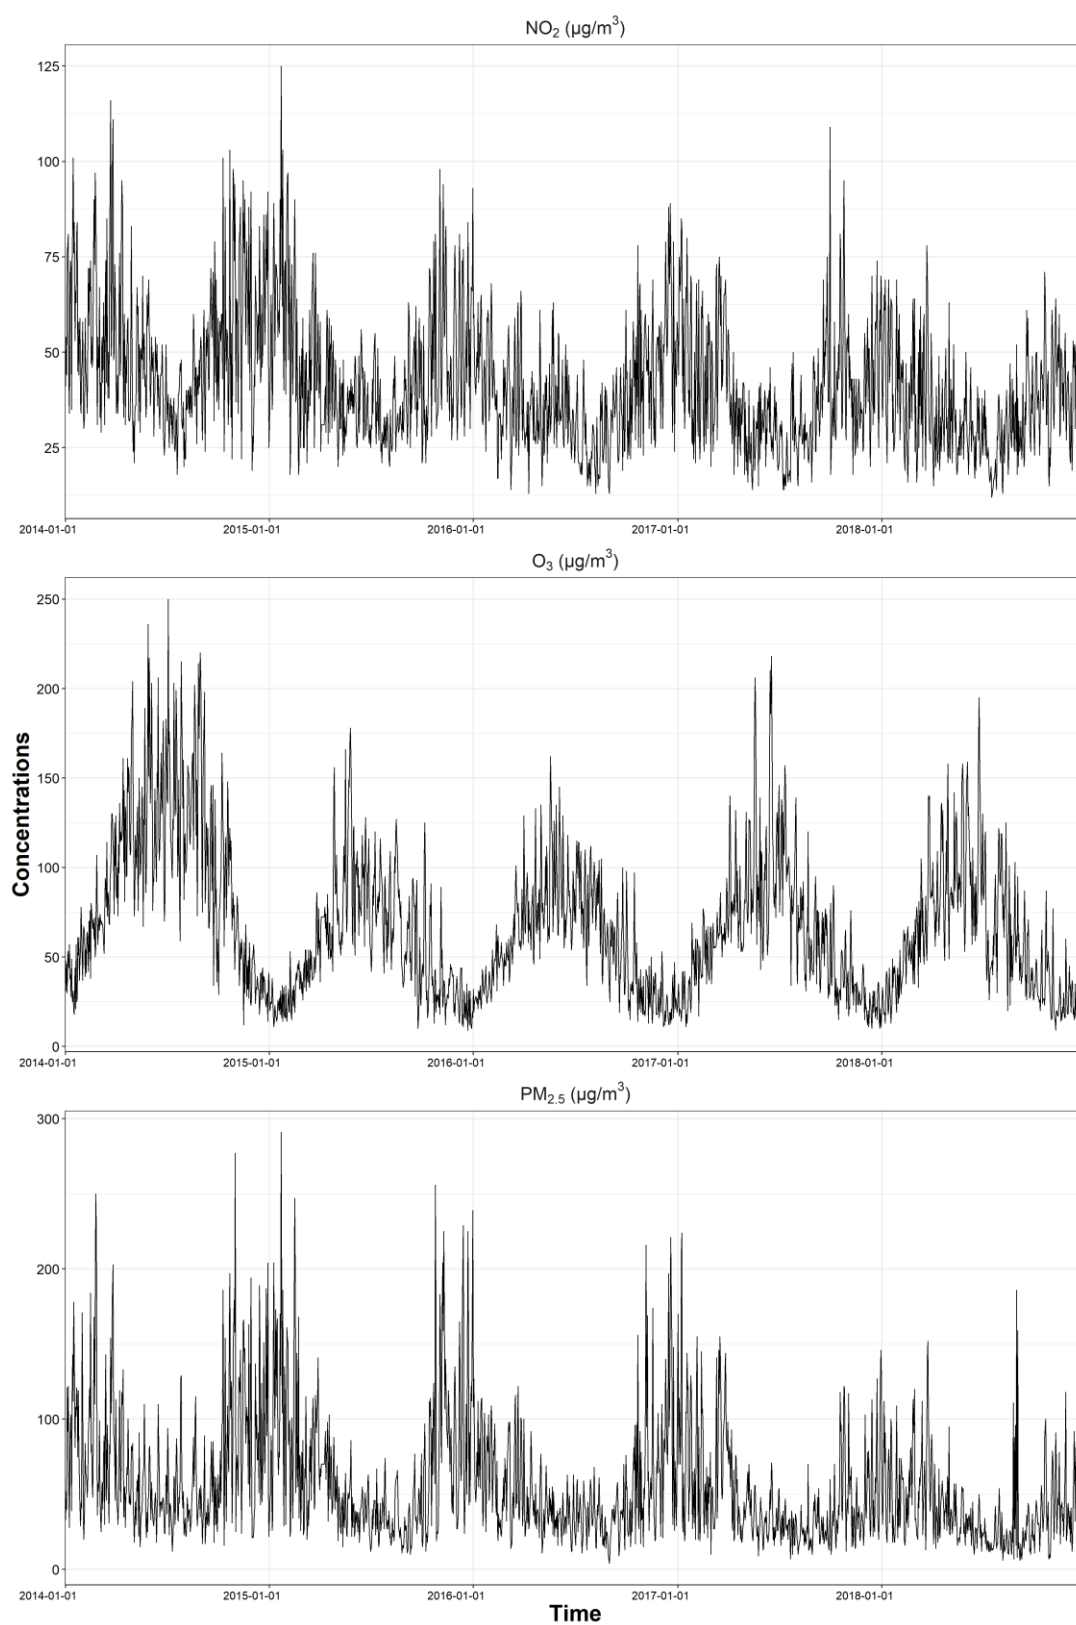

**Figure S1.** Time series of the concentrations of  $\text{NO}_2$ ,  $\text{O}_3$ , and  $\text{PM}_{2.5}$ .

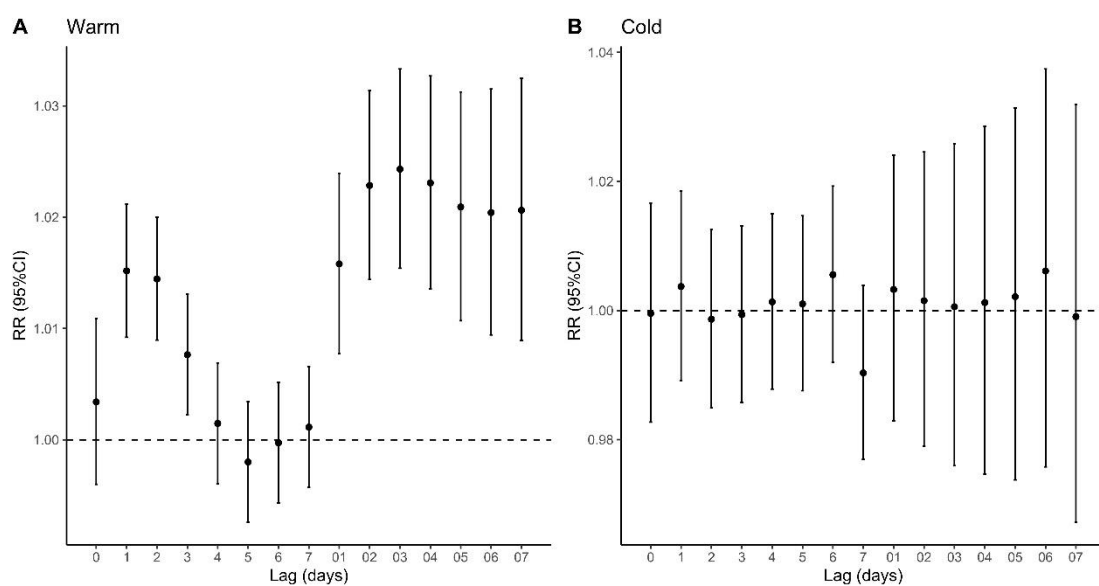

**Figure S2.** Relative risk of respiratory death per 10 µg/m<sup>3</sup> increase in O<sub>3</sub> concentration at single-day lags and multi-day cumulative lags. A: the warm season (from April to October); B: the cold season (from October to April);.

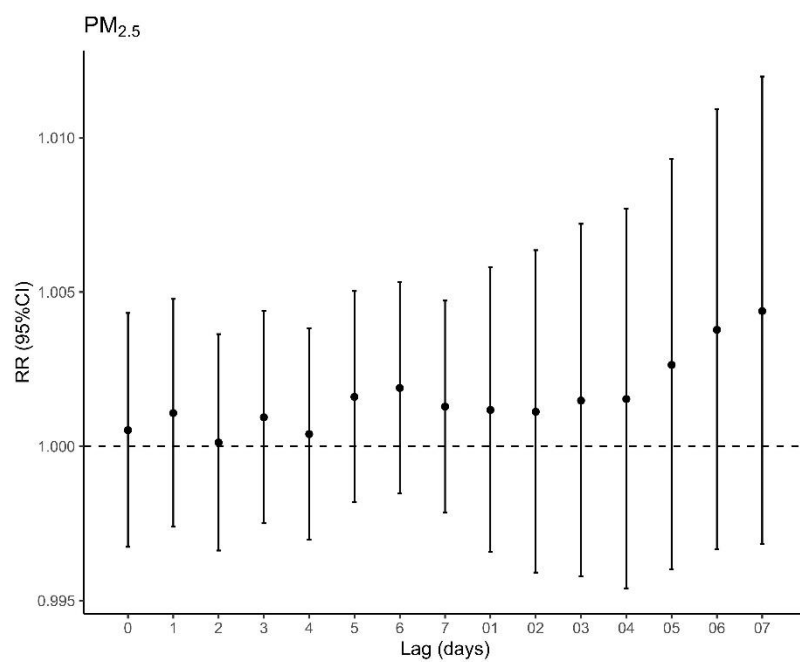

**Figure S3.** Relative risk of respiratory death per 10 µg/m<sup>3</sup> increase in PM<sub>2.5</sub> concentration at single-day lags and multi-day cumulative lags.

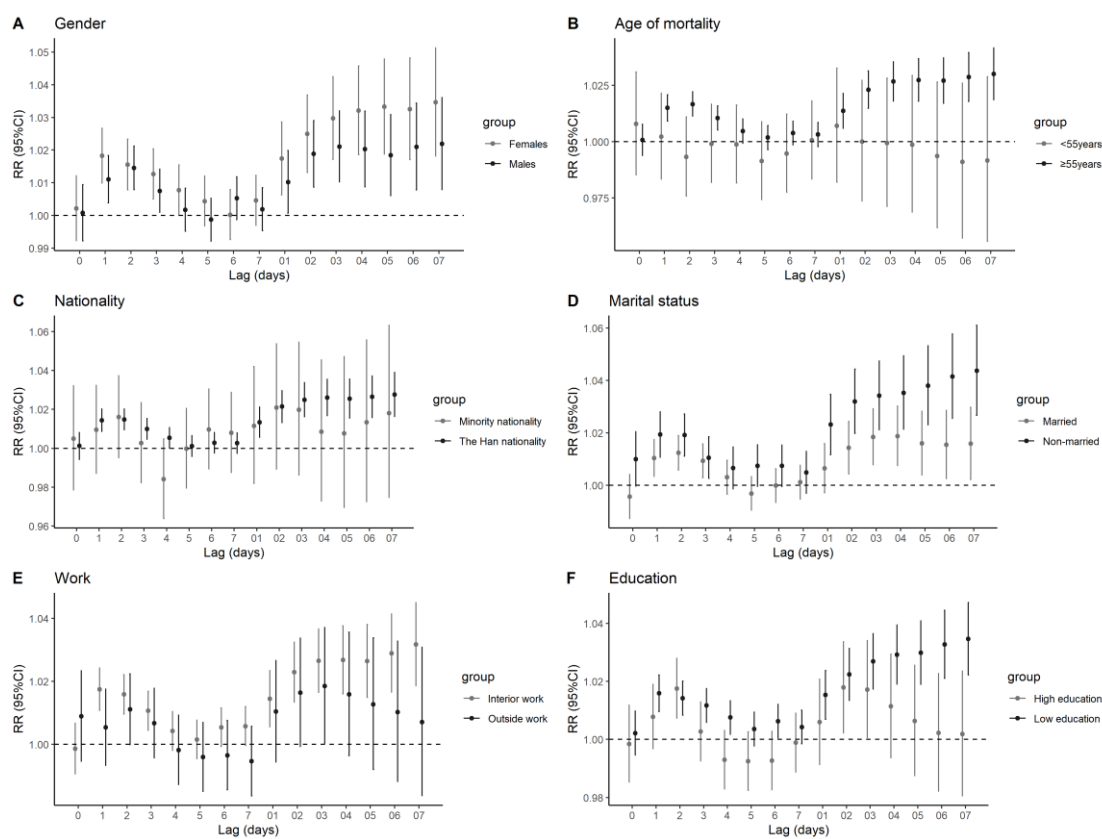

**Figure S4.** Relative risk of respiratory death per 10  $\mu\text{g}/\text{m}^3$  increase in  $\text{O}_3$  concentration of population stratifications at single-day lags and multi-day cumulative lags.
